# Supplementary material for: The use of expanded carrier screening of gamete donors
Source: PubMed Central journal article supplement — Hum Reprod. 2021 Apr 11;36(6):1702–10. doi: 10.1093/humrep/deab067 (PMC8129592; doi:10.1093/humrep/deab067), 2021-04-11
Supplement: deab067_supplementary_data.pdf [file deab067_supplementary_data.pdf]

human reproduction **SUPPLEMENTARY DATA**

**Supplementary Table S1** Overview of companies and panels associated.

|            | Country   | Panel | Number of Genes | Number of Inherited Disorders | Cost                  | Sperm Donor Testing Recommendation | Egg Donor Testing Recommendation |
|------------|-----------|-------|-----------------|-------------------------------|-----------------------|------------------------------------|----------------------------------|
| Company 1  | UK        | 1A    | 420             | 418                           | £16738 for 96 samples | ✗                                  | ✗                                |
| Company 2  | USA       | 2A    | 176             | –                             | –                     | ✓                                  | ✓                                |
| Company 3  | USA       | 3A    | 4               | –                             | –                     | ✓                                  | ✓                                |
|            |           | 3B    | 14              | –                             | –                     | ✓                                  | ✓                                |
|            |           | 3C    | 27              | –                             | –                     | ✓                                  | ✓                                |
|            |           | 3D    | 106             | –                             | –                     | ✓                                  | ✓                                |
|            |           | 3E    | 274             | –                             | –                     | ✓                                  | ✓                                |
| Company 4  | Australia | 4A    | 3               | 3                             | \$345                 | ✗                                  | ✗                                |
| Company 5  | USA       | 5A    | 283             | >280                          | –                     | ✓                                  | ✓                                |
| Company 6  | USA       | 6A    | 3               | 3                             | –                     | ✓                                  | ✓                                |
|            |           | 6B    | 25              | 29                            | –                     | ✓                                  | ✓                                |
|            |           | 6C    | >150            | >150                          | –                     | ✓                                  | ✓                                |
|            |           | 6D    | >280            | >280                          | –                     | ✓                                  | ✓                                |
| Company 7  | Germany   | 7A    | 332             | 330                           | –                     | ✗                                  | ✗                                |
| Company 8  | Australia | 8A    | 3               | 3                             | \$389                 | ✗                                  | ✗                                |
| Company 9  | USA       | 9A    | 6               | –                             | –                     | ✓                                  | ✓                                |
|            |           | 9B    | 46              | –                             | –                     | ✓                                  | ✓                                |
|            |           | 9C    | 301             | –                             | –                     | ✓                                  | ✓                                |
| Company 10 | USA       | 10A   | 3               | 3                             | –                     | ✗                                  | ✗                                |
|            |           | 10B   | 14              | 13                            | –                     | ✗                                  | ✗                                |
|            |           | 10C   | 144             | >116                          | –                     | ✗                                  | ✗                                |
|            |           | 10D   | 525             | 525                           | –                     | ✗                                  | ✗                                |
| Company 11 | Australia | 11A   | 553             | 590                           | \$750                 | ✗                                  | ✗                                |
| Company 12 | Spain     | 12A   | >200            | >200                          | –                     | ✓                                  | ✓                                |
| Company 13 | USA       | 13A   | 6               | –                             | –                     | ✓                                  | ✓                                |
|            |           | 13B   | 30              | –                             | –                     | ✓                                  | ✓                                |
|            |           | 13C   | 401             | >400                          | –                     | ✓                                  | ✓                                |
|            |           | 13D   | 410             | >400                          | –                     | ✓                                  | ✓                                |
| Company 14 | USA       | 14A   | –               | >180                          | –                     | ✓                                  | ✓                                |
|            |           | 14B   | –               | >180                          | –                     | ✓                                  | ✓                                |
| Company 15 | Italy     | 15A   | >300            | >600                          | –                     | ✓                                  | ✓                                |
|            |           | 15B   | >550            | >700                          | –                     | ✓                                  | ✓                                |
|            |           | 15C   | >900            | >1400                         | –                     | ✓                                  | ✓                                |
| Company 16 | Spain     | 16A   | 1577            | >1600                         | –                     | ✗                                  | ✗                                |
|            |           | 16B   | 306             | 352                           | –                     | ✗                                  | ✗                                |
|            |           | 16C   | 8               | –                             | –                     | ✗                                  | ✗                                |
|            |           | 16D   | 19              | 20                            | –                     | ✗                                  | ✗                                |
|            |           | 16E   | 34              | –                             | –                     | ✓                                  | ✗                                |
|            |           | 16F   | 250             | –                             | –                     | ✗                                  | ✗                                |
|            |           | 16G   | 600             | –                             | –                     | ✓                                  | ✓                                |
|            |           | 16H   | 250             | –                             | –                     | ✗                                  | ✗                                |
|            |           | 16I   | 600             | –                             | –                     | ✗                                  | ✗                                |

Compilation of the country, number of panels, the number of genes and inherited disorders present in each panel, the cost and whether the panels are recommended for gamete donors for each company.
